# Supplementary material for: Calibrating and validating the Integrated Valuation of Ecosystem Services and Tradeoffs (InVEST) urban cooling model: case studies in France and the United States
Source: Copernicus journal article supplement (doi:10.5194/gmd-17-4755-2024), 2024-06-18
Supplement: Supplementary file 1 [file gmd-17-4755-2024-supplement.zip]

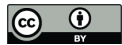

*Supplement of*

## **Calibrating and validating the Integrated Valuation of Ecosystem Services and Tradeoffs (InVEST) urban cooling model: case studies in France and the United States**

**Perrine Hamel et al.**

*Correspondence to:* Perrine Hamel ([perrine.hamel@ntu.edu.sg](mailto:perrine.hamel@ntu.edu.sg))

- [gmd-17-4755-2024-supplement-title-page.pdf](#)
- Supplementary information
  - Paris
    - \* [biophysical\\_table\\_Paris\\_2023.csv](#)
    - \* [biophysical\\_table\\_Paris\\_2023\\_scenarioLHV.csv](#)
  - Twin Cities
    - \* [Biophysical\\_table\\_TwinCities.csv](#)

The copyright of individual parts of the supplement might differ from the article licence.
